# Supplementary material for: A novel smartphone app to change risk behaviors of women after gestational diabetes: A randomized controlled trial
Source: PLOS journal article supplement (doi:10.1371/journal.pone.0267258), 2022-04-27
Supplement: S6 (10.1371/journal.pone.0267258.s006) [file journal.pone.0267258.s006]

**S5 Table: Baseline characteristics with additional values for the dropouts in both the control and the intervention group and with the per-protocol group**

|                                         |                  | Control<br>ITT      | Control<br>dropouts  | Intervention<br>ITT | Intervention<br>dropouts | Per-protocol         | Non-per-<br>protocol |
|-----------------------------------------|------------------|---------------------|----------------------|---------------------|--------------------------|----------------------|----------------------|
| <b>n</b>                                |                  | 27                  | 6                    | 27                  | 6                        | 14                   | 13                   |
| <b>Age [years]</b>                      |                  | 35.8±4.4            | 35.5±4.6             | 37.3±2.9            | 35.5±3.9                 | 37.6±3.5             | 37.0±2.2             |
| <b>Insulin during pregnancy</b>         |                  | 12 (44.4%)          | 2 (33.3%)            | <b>14 (51.9%)*</b>  | <b>0 (0%)*</b>           | 10 (71.4%)           | 4 (30.1%)            |
| <b>Family history of diabetes</b>       |                  | 9 (33.3%)           | 3 (50.0%)            | 7 (25.9%)           | 1 (16.7%)                | 5 (35.7%)            | 2 (15.4%)            |
| <b>German as native language</b>        |                  | 18 (66.7%)          | 3 (50.0%)            | 24 (88.9%)          | 5 (83.3%)                | 14 (100.0%)          | 10 (76.9%)           |
| <b>Highest degree</b>                   | Secondary school | 5 (18.5%)           | 0 (0%)               | 4 (14.8%)           | 1 (16.7%)                | 3 (21.4%)            | 2 (15.4%)            |
|                                         | A-levels         | 5 (18.5%)           | 2 (33.3%)            | 6 (22.2%)           | 0 (0%)                   | 4 (28.6%)            | 1 (7.7%)             |
|                                         | University       | 17 (63.0%)          | 4 (66.7%)            | 17 (63.0%)          | 5 (83.3%)                | 7 (50.0%)            | 10 (76.9%)           |
| <b>Active smoker</b>                    |                  | 1 (3.7%)            | 1 (16.7%)            | 1 (3.7%)            | 1 (16.7%)                | 1 (7.1%)             | 0 (0%)               |
| <b>Currently in a job</b>               |                  | 3 (11.1%)           | 0 (0%)               | 6 (22.2%)           | 2 (33.3%)                | 5 (35.7%)            | 1 (7.7%)             |
| <b>Current breast feeding</b>           | No               | 9 (33.3%)           | 4 (66.7%)            | 6 (22.2%)           | 2 (33.3%)                | 4 (28.6%)            | 2 (15.4%)            |
|                                         | Partial          | 9 (33.3%)           | 2 (33.3%)            | 12 (44.4%)          | 2 (33.3%)                | 6 (42.8%)            | 6 (46.2%)            |
|                                         | Full             | 9 (33.3%)           | 0 (0%)               | 9 (33.3%)           | 2 (33.3%)                | 4 (28.6%)            | 5 (38.5%)            |
| <b>Oral contra-<br/>ceptive use</b>     |                  | 3 (11.1%)           | 0 (0%)               | 3 (11.1%)           | 0 (0%)                   | 0 (0.0%)             | 3 (23.1%)            |
| <b>Time since<br/>delivery [months]</b> |                  | 6 (5-8)             | 9 (5-14)             | 6 (5-11)            | 7 (4-10)                 | 6 (5-16)             | 6 (4-8)              |
| <b>Sectio caesarea</b>                  |                  | 13 (48.2%)          | 2 (33.3.0%)          | 10 (37.0%)          | 0 (0%)                   | 4 (28.6%)            | 6 (46.2%)            |
| <b>Physical activity<br/>[min/week]</b> |                  | 803<br>(580-1,620)  | 1,055<br>(435-1,310) | 855<br>(530-1,530)  | 1,000<br>(870-1,550)     | 670<br>(435-1,455)   | 960<br>(650-1,530)   |
| <b>Body weight [kg]</b>                 |                  | 72.5<br>(66.3-84.4) | 78.4<br>(66.6-86.9)  | 72.6<br>(61.9-83.2) | 64.7<br>(60.2-73.5)      | 66.9<br>(61.9 -76.5) | 75.4<br>(62.2 -86.0) |

S5 Table (continued)

|                                    |         | Control<br>ITT      | Control<br>dropouts | Intervention<br>ITT | Intervention<br>dropouts | Per-protocol        | Non-per-<br>protocol |
|------------------------------------|---------|---------------------|---------------------|---------------------|--------------------------|---------------------|----------------------|
| n                                  |         | 27                  | 6                   | 27                  | 6                        | 14                  | 13                   |
| Body fat mass<br>[kg]              |         | 28 (20-36)          | 30 (22-35)          | 22 (18-31)          | 22 (18-28)               | 21 (17-27)          | 28 (19-35)           |
| BMI [kg/m <sup>2</sup> ]           |         | 26.3<br>(23.2-30.3) | 27.0<br>(24.1-33.8) | 25.4<br>(22.1-30.5) | 23.1<br>(22.9-26.4)      | 23.8<br>(21.3-27.2) | 28.4<br>(23.4-31.1)  |
| BMI category                       | ≥ 23    | 21 (77.8%)          | 6 (100%)            | 19 (70.4%)          | 3 (50%)                  | 8 (57.1%)           | 11 (84.6%)           |
|                                    | < 23    | 6 (22.2%)           | 0 (0%)              | 8 (29.6%)           | 3 (50%)                  | 6 (42.9%)           | 2 (15.2%)            |
| AUC glucose<br>[mg/dl*min]         |         | 36,196<br>±7,704    | 32,305<br>±9,822    | 33,185<br>±6,794    | 32,870<br>±5,819         | 33,092<br>±7,406    | 33,292<br>±6,330     |
| Disposition index<br>(DI)          |         | 209<br>(122-282)    | 210<br>(169-260)    | 248<br>(180-312)    | 254<br>(189-278)         | 253<br>(180-312)    | 247<br>(168-325)     |
| Insulin sensitivity<br>index (ISI) |         | 4.3 (1.9-6.6)       | 5.8 (3.8-6.7)       | 4.9 (3.1-6.2)       | 4.9 (4.3-5.7)            | 4.7 (3.8-5.5)       | 5.6 (2.5-6.7)        |
| VO <sub>2</sub> peak [ml/min]      |         | 1,926±439           | 2,027±293           | 1,889±351           | 2,062±305                | 1,966±369           | 1,818±334            |
| WHO-5 score                        |         | 14.4±3.4            | 13.2±3.3            | 14.4±3.1            | 13.2±6.6                 | 13.8±3.2            | 15.2±3.1             |
| WHO-5 score < 13                   |         | 10 (37.0%)          | 2 (33.3%)           | 6 (22.2%)           | 2 (33.3%)                | 4 (28.6%)           | 2 (15.4%)            |
| PSS-10 score                       |         | 15.3±5.8            | 15.7±6.9            | 14.2±5.3            | 12.7±8.5                 | 15.5±5.1            | 12.8±5.2             |
| Glucose<br>tolerance status        | Normal  | 14 (51.8%)          | 5 (83.3%)           | 16 (59.2%)          | 5 (83.3%)                | 9 (64.3%)           | 6 (50%)              |
|                                    | IFG     | 2 (7.4%)            | 0 (0%)              | 5 (18.5%)           | 0 (0%)                   | 1 (7.1%)            | 4 (33.3%)            |
|                                    | IGT     | 8 (29.6%)           | 1 (16.7%)           | 5 (18.5%)           | 1 (16.7%)                | 3 (21.4%)           | 2 (16.7%)            |
|                                    | IFG+IGT | 3 (11.1%)           | 0 (0%)              | 1 (3.7%)            | 0 (0%)                   | 1 (7.1%)            | 0 (0%)               |

n (percent) for categorical variables, mean ± standard deviation for normally distributed metric variables, median (first and third quartile) for other metric variables; <sup>a, b)</sup> Chi-Square or Fisher-Exact Test for categorical and Mann-Whitney-U Test for metric variables; control ITT vs. control dropouts, intervention ITT vs. intervention dropouts, per-protocol vs. non-per-protocol; **all p-values ≥ 0.05 except for <sup>a)</sup>**. The per-protocol group is a subset of participants of the intervention group who used the core features of the app regularly throughout the study. AUC glucose = area under the glucose curve, DPP = Diabetes Prevention Program, IFG = impaired fasting glucose, IGT = impaired glucose tolerance, ITT = intention to treat, oGTT = oral glucose tolerance test, PSS-10 = Perceived Stress Scale-10 item, VO<sub>2</sub>peak = peak oxygen uptake, WHO-5 = World Health Organization-5 Well-Being Index
